# Supplementary material for: How to Minimize the Environmental Contamination Caused by Hydrocarbon Releases by Onshore Pipelines: The Key Role of a Three-Dimensional Three-Phase Fluid Flow Numerical Model
Source: MDPI journal article supplement (doi:10.3390/w15101900), 2023-05-17
Supplement: s1 [file s1]

Archive with 1 entries (1 files):
- water-2319995-supplementary.pdf
