# Supplementary material for: How to Minimize the Environmental Contamination Caused by Hydrocarbon Releases by Onshore Pipelines: The Key Role of a Three-Dimensional Three-Phase Fluid Flow Numerical Model
Source: MDPI journal article supplement (doi:10.3390/w15101900), 2023-05-17
Supplement: s1 [file s1 › water-2319995-supplementary.pdf]

## Supplementary Material

Three-dimensional numerical results on the saturation contours ( $\sigma_n = S_n \phi$ ) of a three-phase immiscible fluid flow (water + gasoline + air), dry unsaturated zone

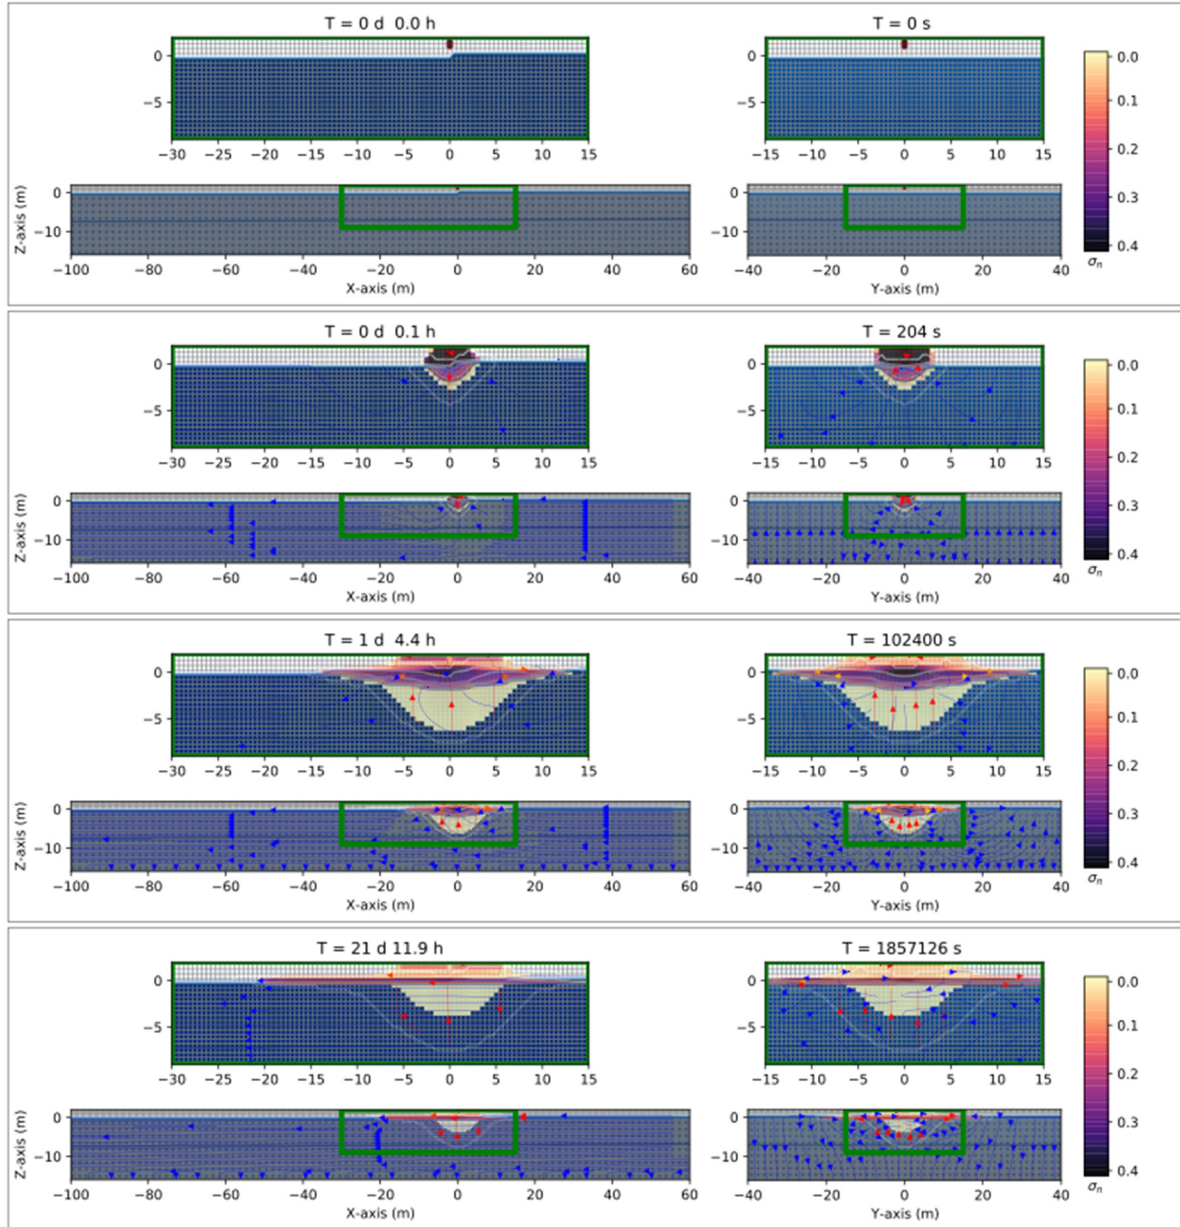

**Figure S1.** Three-dimensional numerical results on the saturation contours ( $\sigma_n = S_n \phi$ ) of a three-phase immiscible fluid flow (water + gasoline + air) in a dry soil using a spatial grid resolution of  $0.50 \text{ m}$  and a grid dimension of  $160 \text{ m} \times 80 \text{ m} \times 18 \text{ m}$ , at different times. A hydraulic gradient of  $0.004$ . The spill is released from an oil pipeline at  $(x, y, z) = (0, 0, 1) \text{ m}$ .

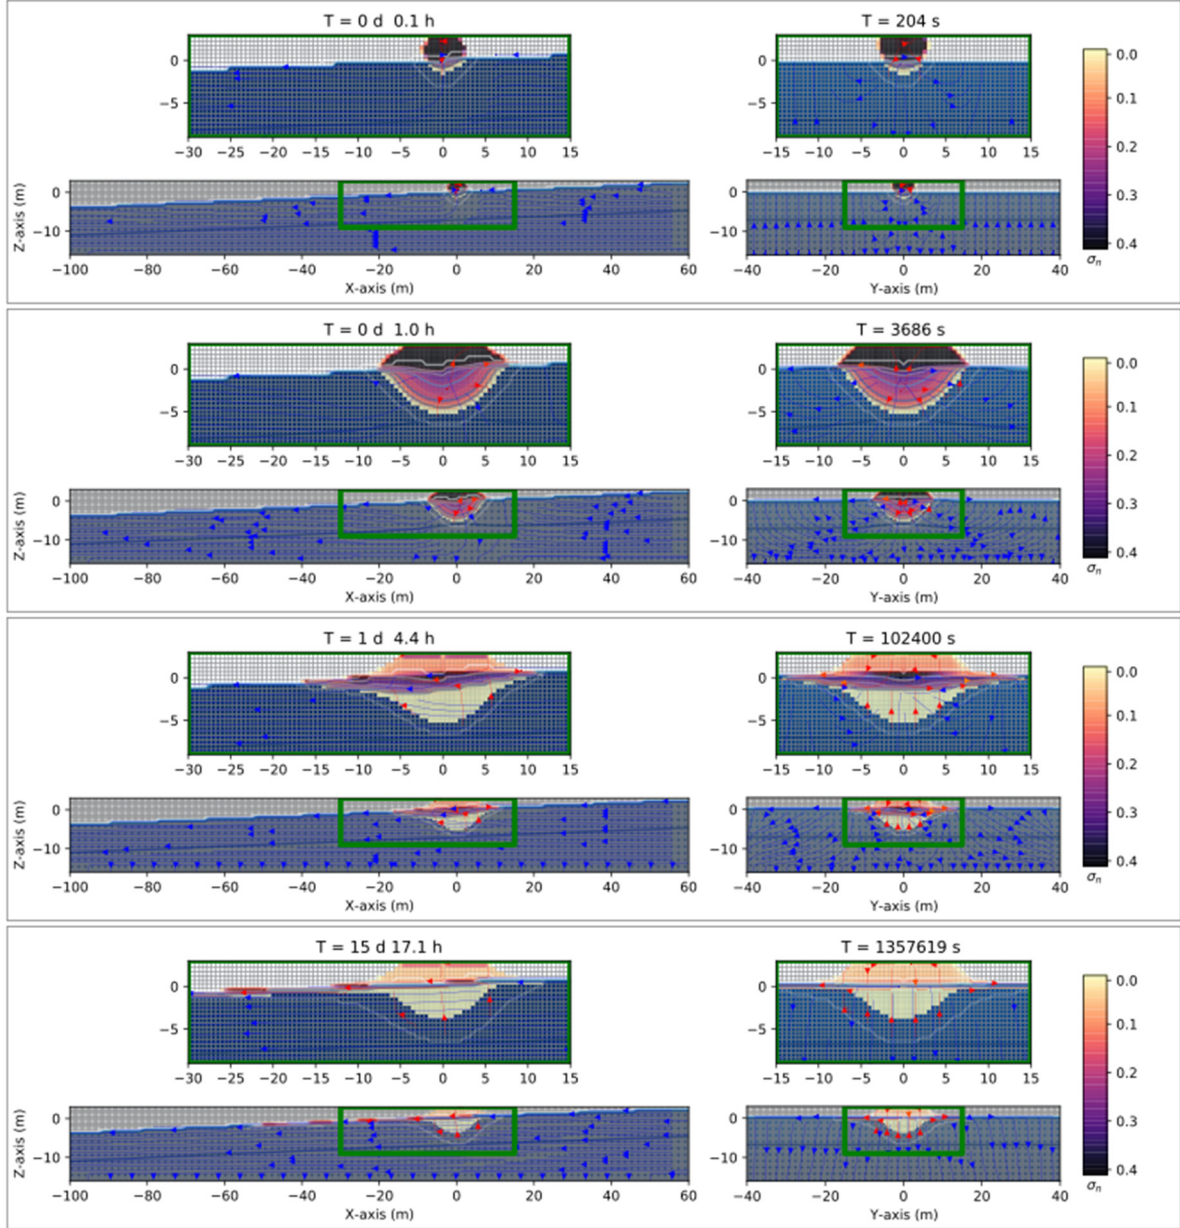

**Figure S2.** Three-dimensional numerical results on the saturation contours ( $\sigma_n = S_n \phi$ ) of a three-phase immiscible fluid flow (water + gasoline + air) in a dry soil using a spatial grid resolution of  $0.50\text{ m}$  and a grid dimension of  $160\text{ m} \times 80\text{ m} \times 19\text{ m}$ , at different times. A hydraulic gradient of  $0.04$ . The spill is released from an oil pipeline at  $(x, y, z) = (0, 0, 2)\text{ m}$ .

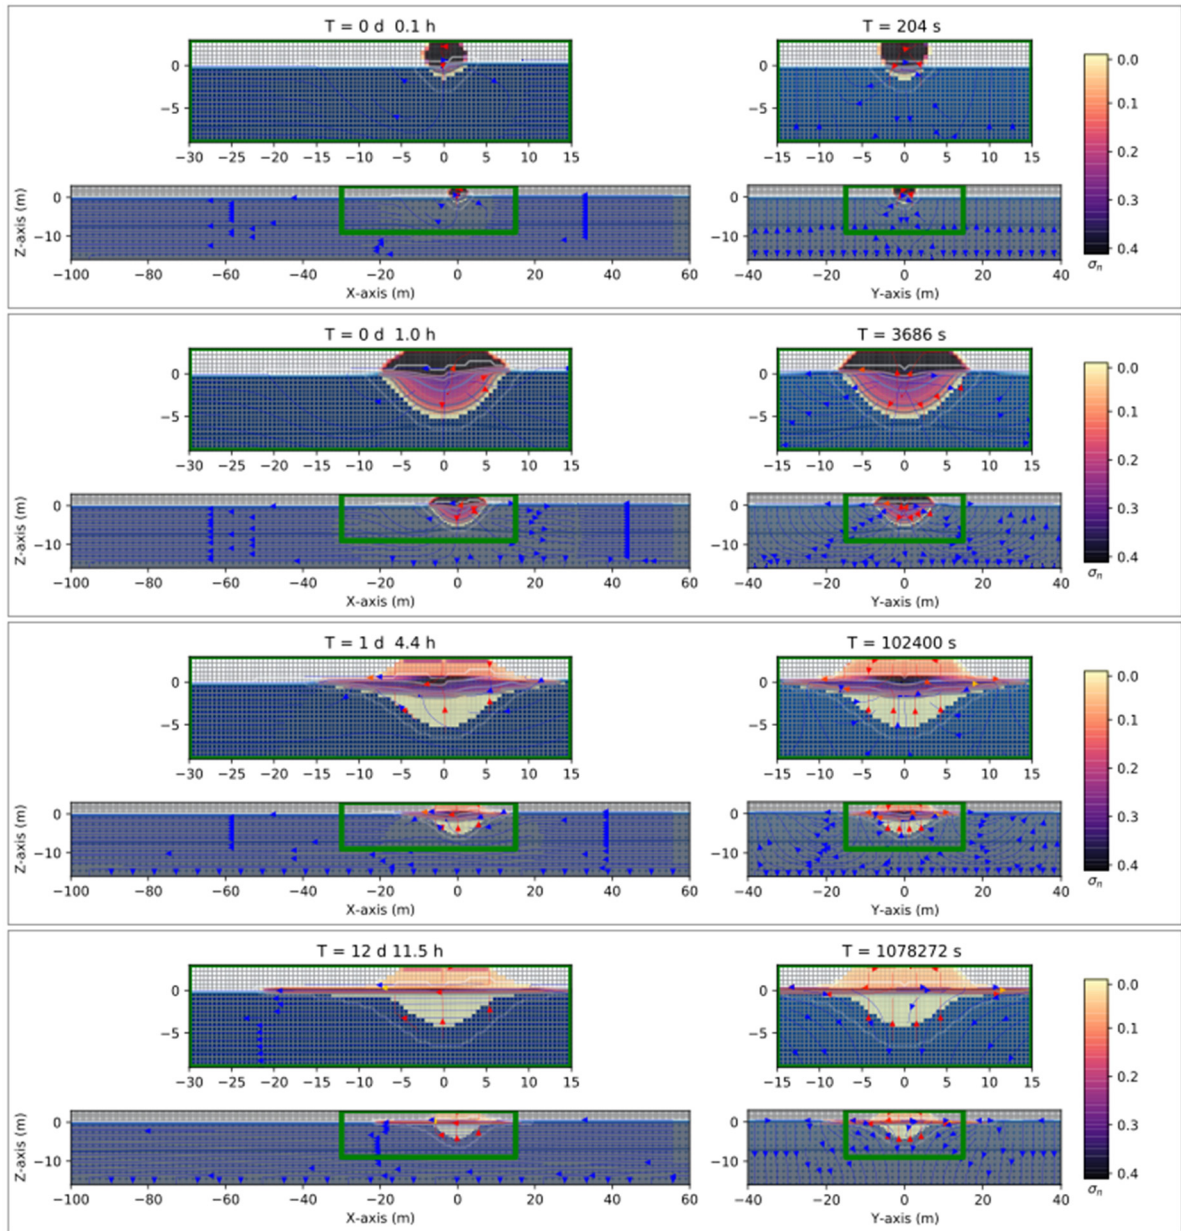

**Figure S3.** Three-dimensional numerical results on the saturation contours ( $\sigma_n = S_n \phi$ ) of a three-phase immiscible fluid flow (water + gasoline + air) in a dry soil using a spatial grid resolution of  $0.50 \text{ m}$  and a grid dimension of  $160 \text{ m} \times 80 \text{ m} \times 19 \text{ m}$ , at different times. A hydraulic gradient of  $0.004$ . The spill is released from an oil pipeline at  $(x, y, z) = (0, 0, 2) \text{ m}$ .

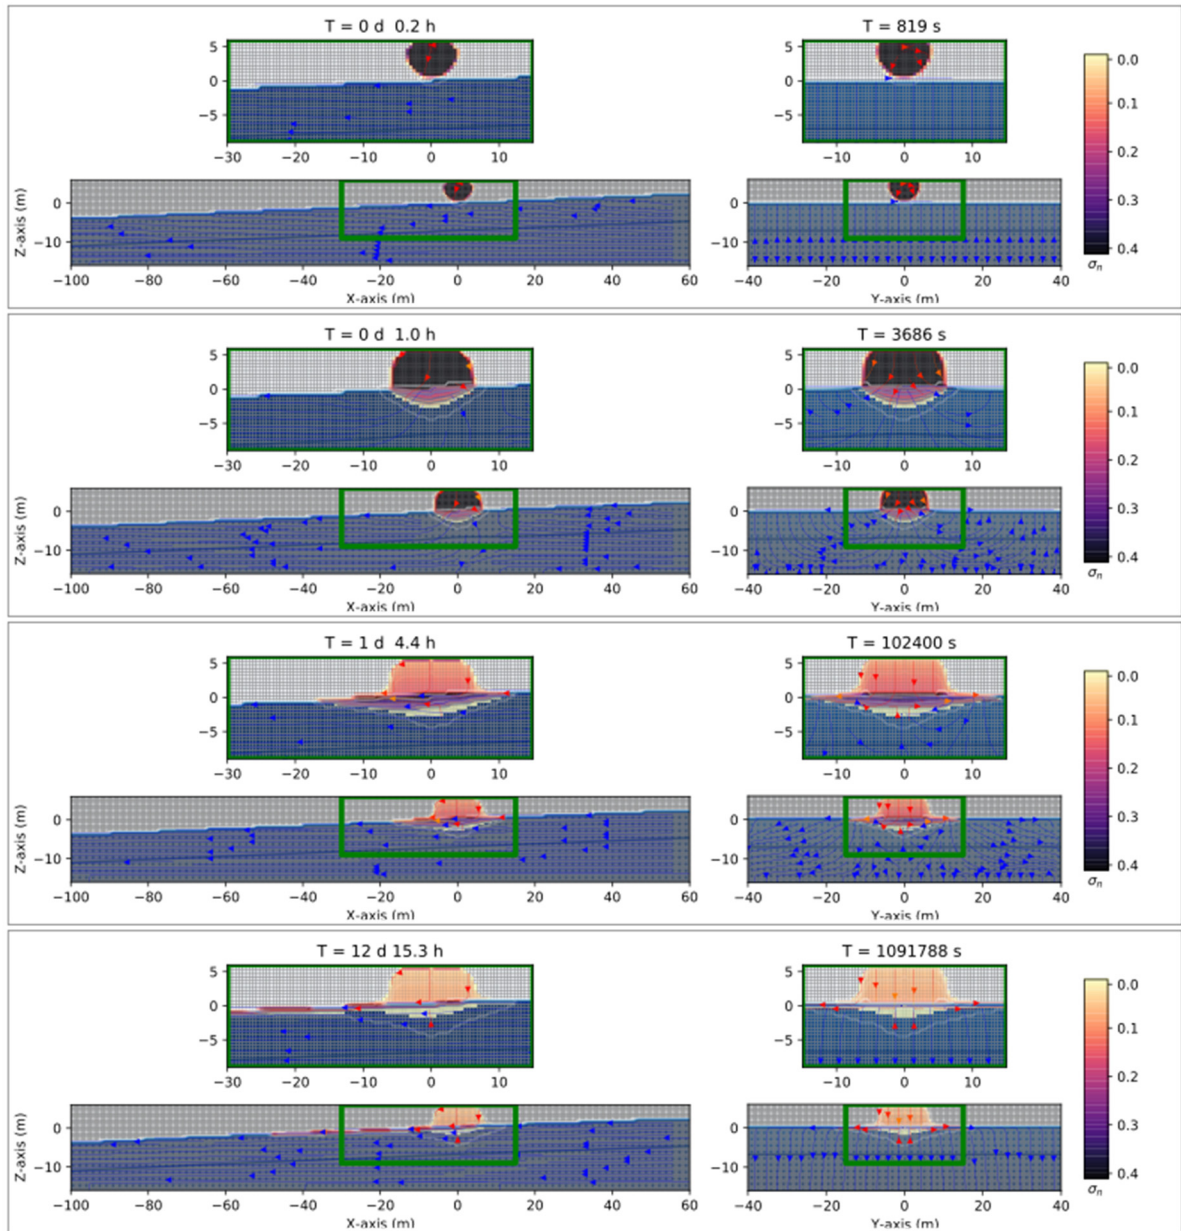

**Figure S4.** Three-dimensional numerical results on the saturation contours ( $\sigma_n = S_n \phi$ ) of a three-phase immiscible fluid flow (water + gasoline + air) in a dry soil using a spatial grid resolution of  $0.50 \text{ m}$  and a grid dimension of  $160 \text{ m} \times 80 \text{ m} \times 21 \text{ m}$ , at different times. A hydraulic gradient of  $0.04$ . The spill is released from an oil pipeline at  $(x, y, z) = (0, 0, 5) \text{ m}$ .

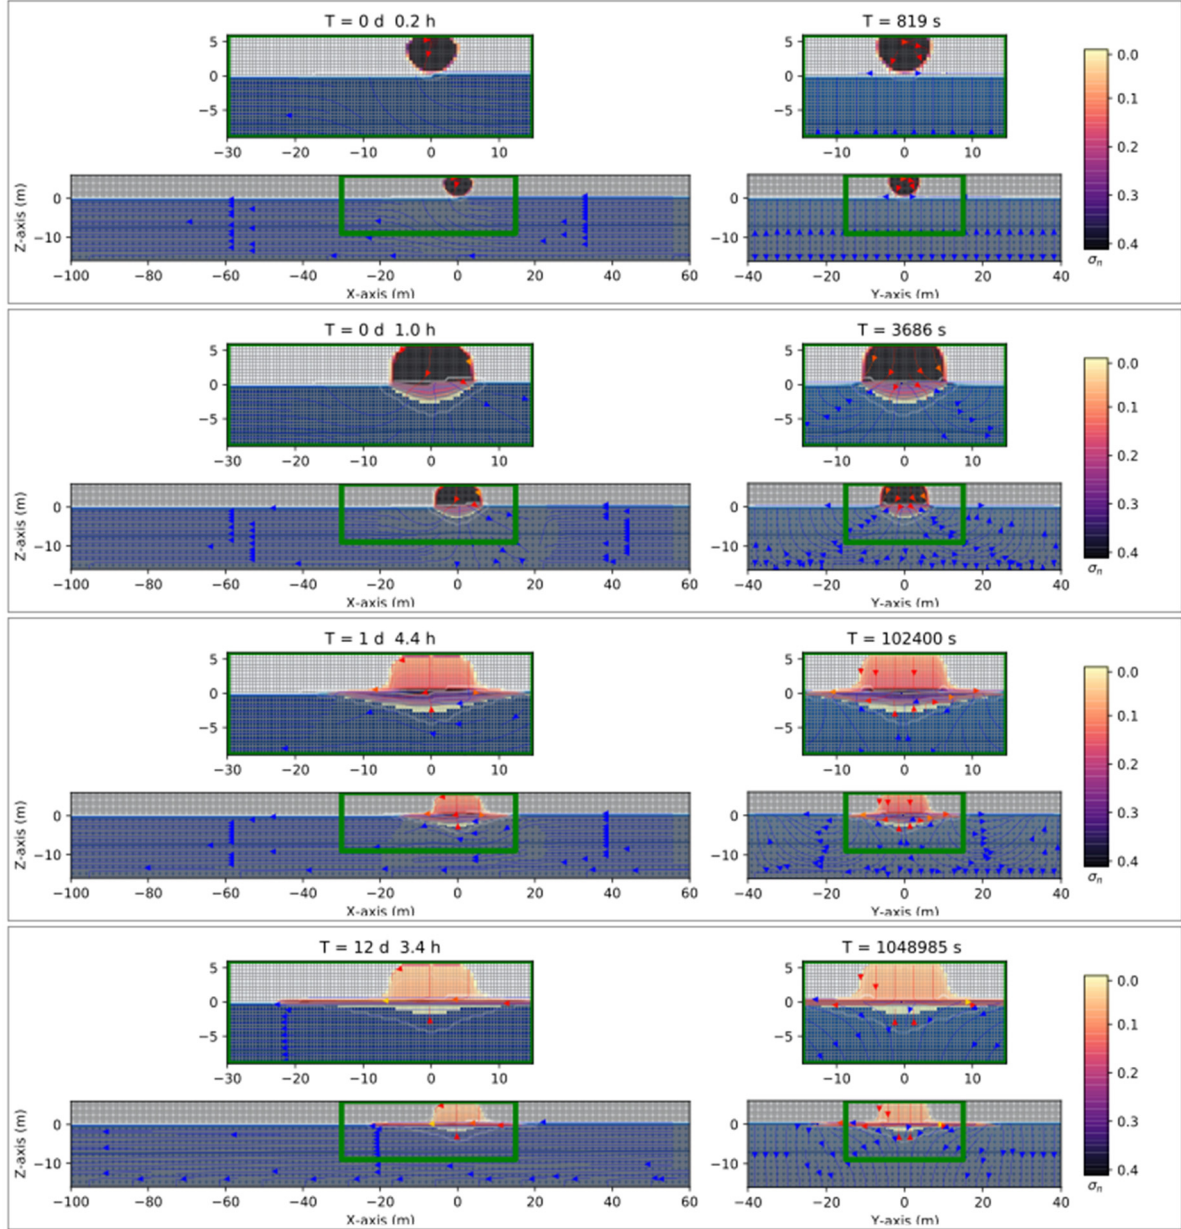

**Figure S5.** Three-dimensional numerical results on the saturation contours ( $\sigma_n = S_n \phi$ ) of a three-phase immiscible fluid flow (water + gasoline + air) in a dry soil using a spatial grid resolution of  $0.50 \text{ m}$  and a grid dimension of  $160 \text{ m} \times 80 \text{ m} \times 21 \text{ m}$ , at different times. A hydraulic gradient of  $0.004$ . The spill is released from an oil pipeline at  $(x, y, z) = (0, 0, 5) \text{ m}$ .

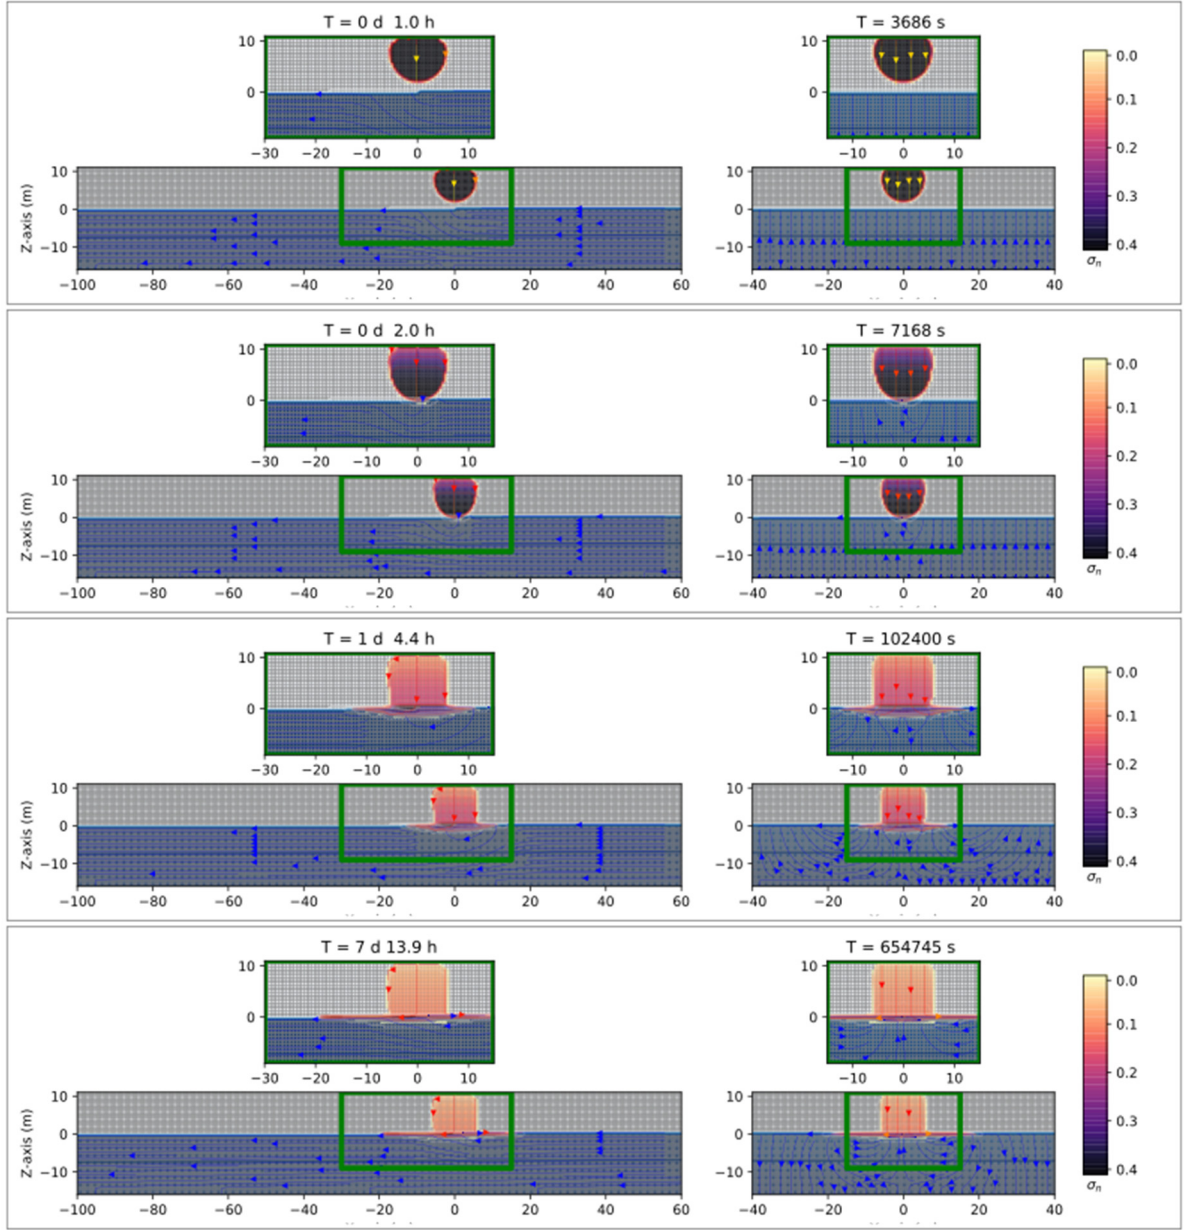

**Figure S6.** Three-dimensional numerical results on the saturation contours ( $\sigma_n = S_n \phi$ ) of a three-phase immiscible fluid flow (water + gasoline + air) in a dry soil using a spatial grid resolution of  $0.50 \text{ m}$  and a grid dimension of  $160 \text{ m} \times 80 \text{ m} \times 27 \text{ m}$ , at different times. A hydraulic gradient of  $0.004$ . The spill is released from an oil pipeline at  $(x, y, z) = (0, 0, 10) \text{ m}$ .

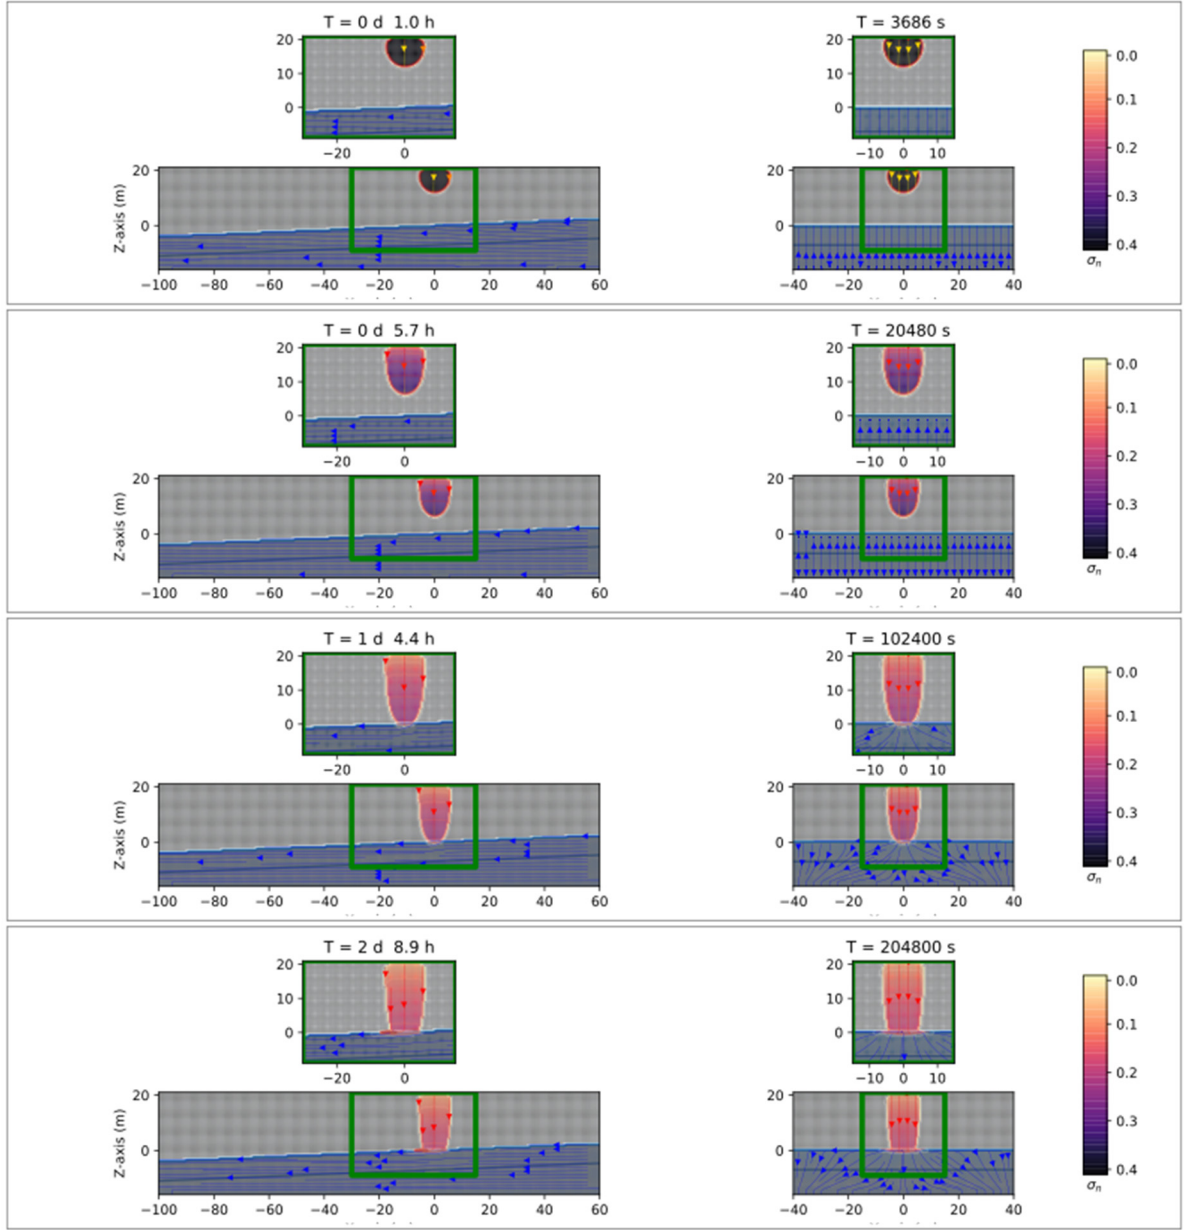

**Figure S7.** Three-dimensional numerical results on the saturation contours ( $\sigma_n = S_n \phi$ ) of a three-phase immiscible fluid flow (water + gasoline + air) in a dry soil using a spatial grid resolution of  $0.50 \text{ m}$  and a grid dimension of  $160 \text{ m} \times 80 \text{ m} \times 37 \text{ m}$ , at different times. A hydraulic gradient of  $0.04$ . The spill is released from an oil pipeline at  $(x, y, z) = (0, 0, 20) \text{ m}$ .

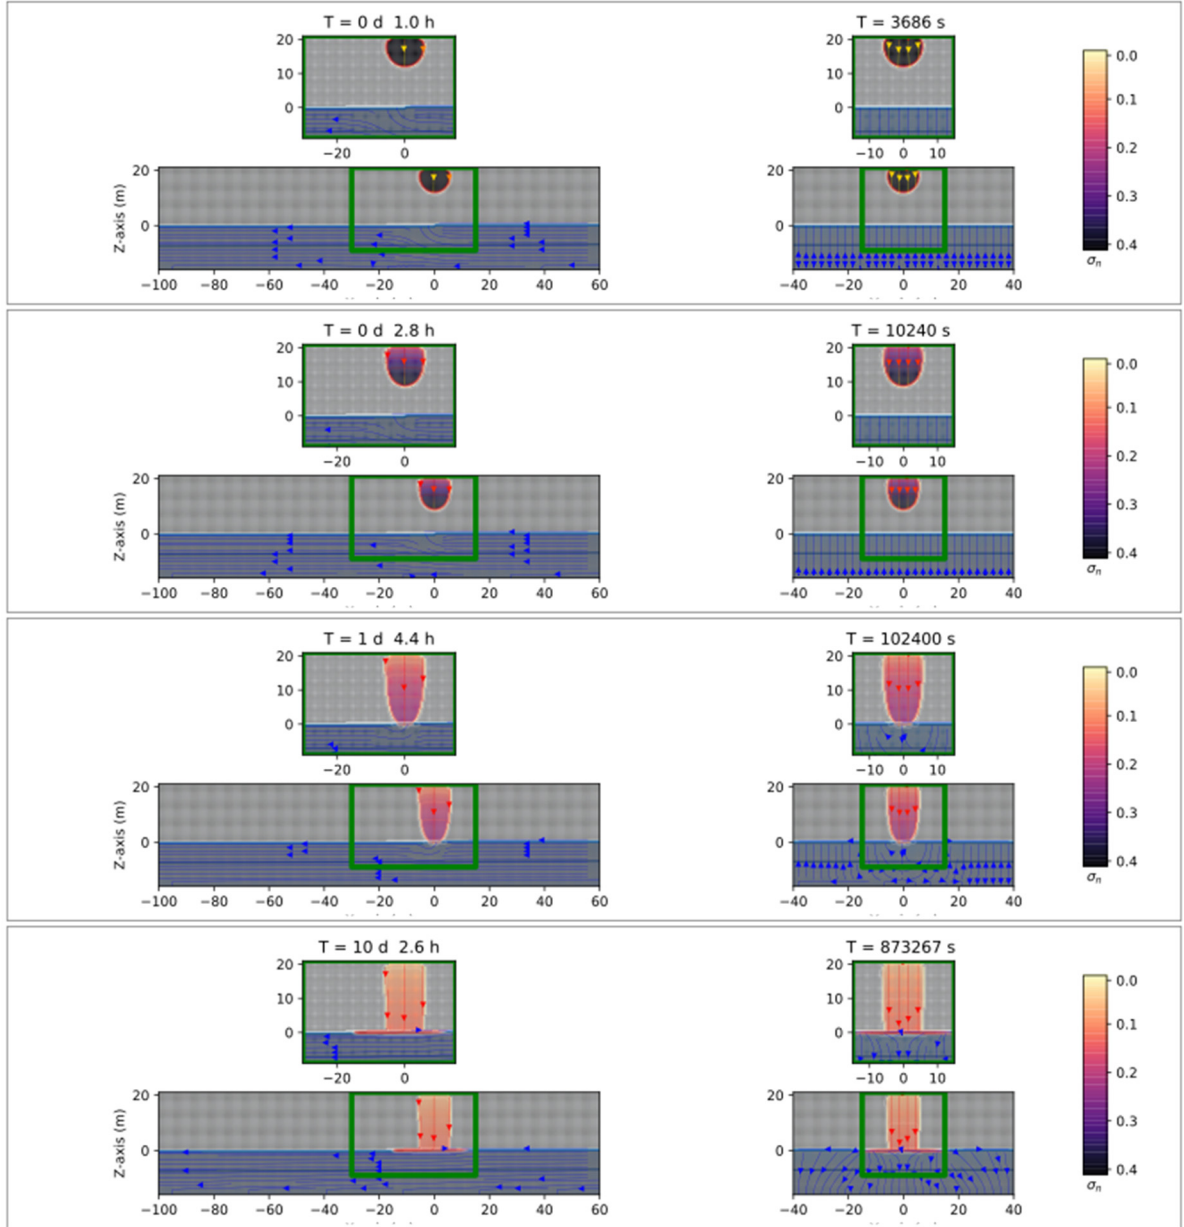

**Figure S8.** Three-dimensional numerical results on the saturation contours ( $\sigma_n = S_n \phi$ ) of a three-phase immiscible fluid flow (water + gasoline + air) in a dry soil using a spatial grid resolution of 0.50 m and a grid dimension of 160 m × 80 m × 37 m, at different times. A hydraulic gradient of 0.004. The spill is released from an oil pipeline at  $(x, y, z) = (0, 0, 20)$  m.

**Three-dimensional numerical results on the saturation contours ( $\sigma_n = S_n \phi$ ) of a three-phase immiscible fluid flow (water + diesel oil + air), dry unsaturated zone**

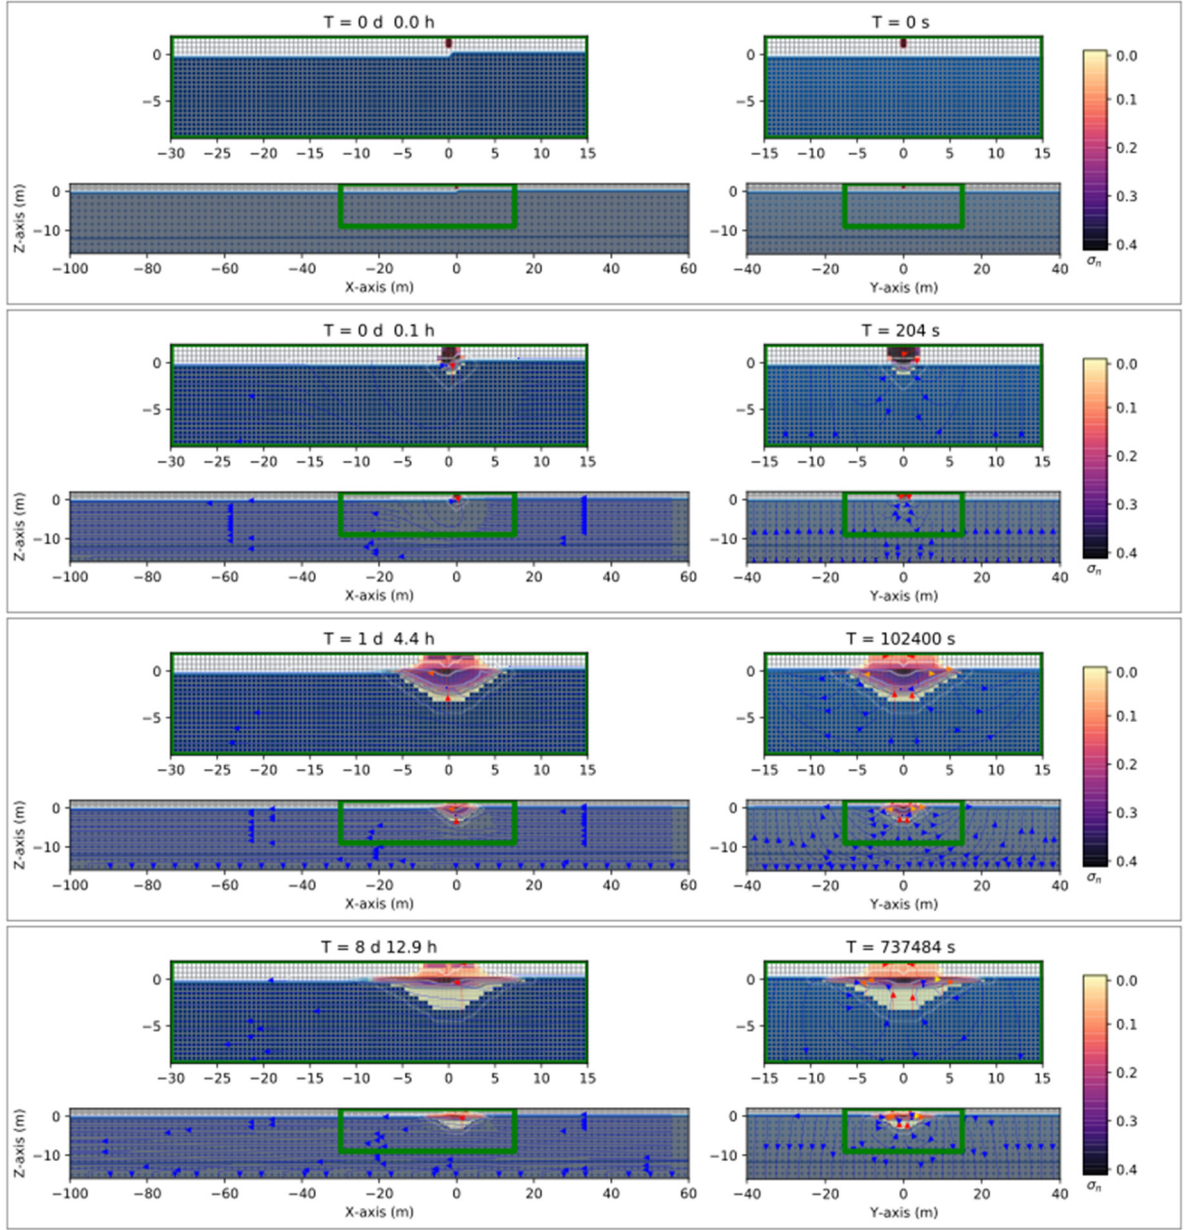

**Figure S9.** Three-dimensional numerical results on the saturation contours ( $\sigma_n = S_n \phi$ ) of a three-phase immiscible fluid flow (water + diesel oil + air) in a dry soil using a spatial grid resolution of  $0.50 \text{ m}$  and a grid dimension of  $160 \text{ m} \times 80 \text{ m} \times 18 \text{ m}$ , at different times. A hydraulic gradient of  $0.004$ . The spill is released from an oil pipeline at  $(x, y, z) = (0, 0, 1) \text{ m}$ .

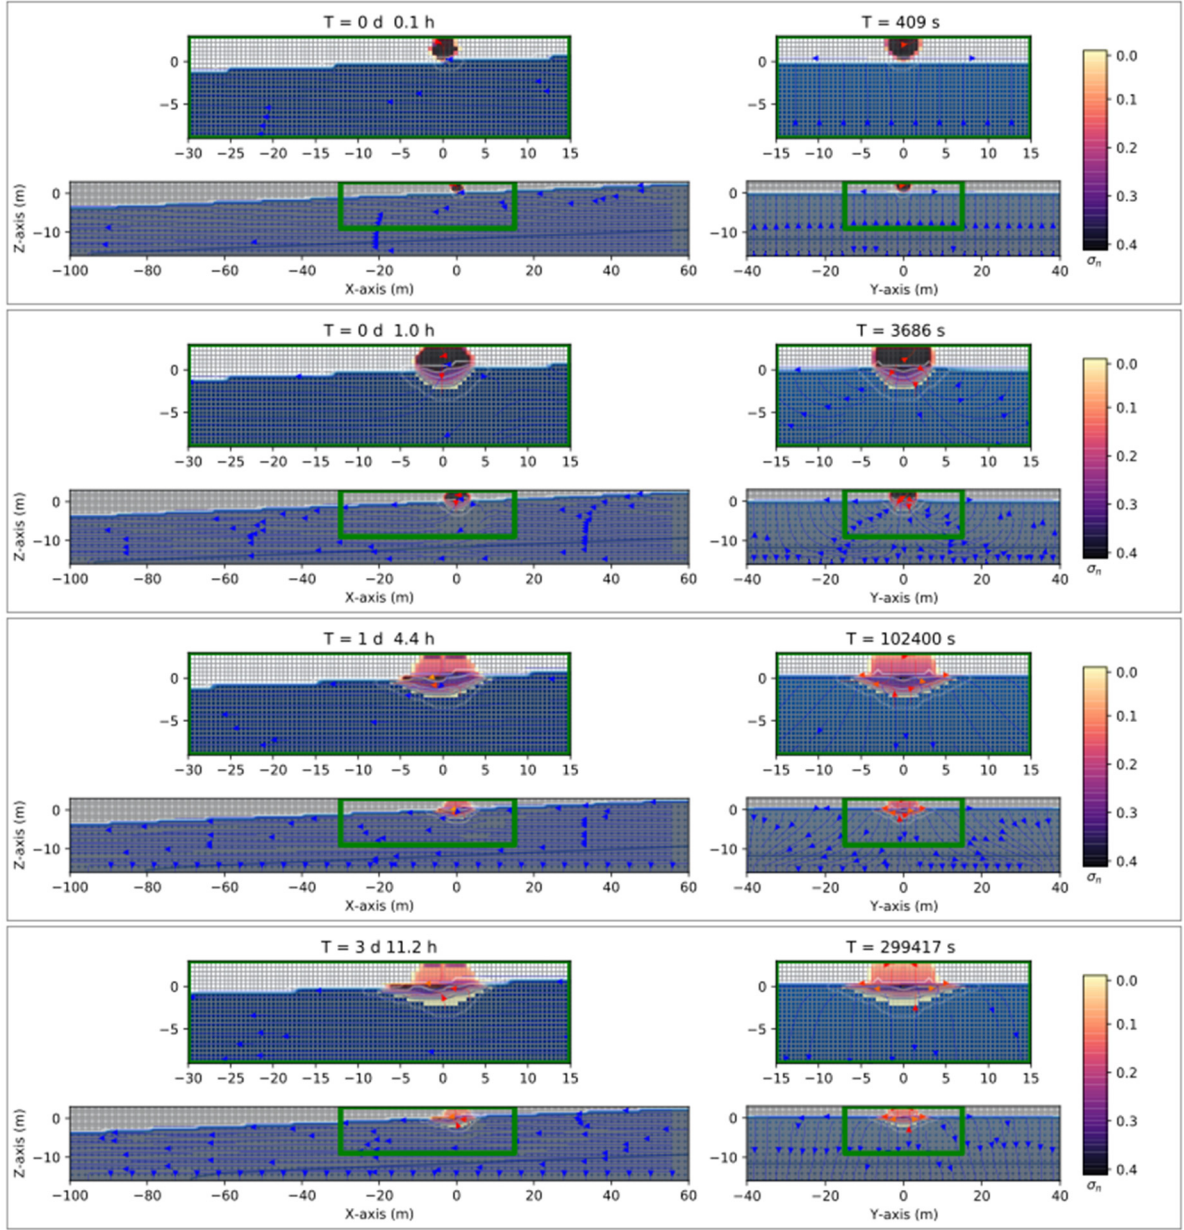

**Figure S10.** Three-dimensional numerical results on the saturation contours ( $\sigma_n = S_n \phi$ ) of a three-phase immiscible fluid flow (water + diesel oil + air) in a dry soil using a spatial grid resolution of  $0.50 \text{ m}$  and a grid dimension of  $160 \text{ m} \times 80 \text{ m} \times 19 \text{ m}$ , at different times. A hydraulic gradient of  $0.04$ . The spill is released from an oil pipeline at  $(x, y, z) = (0, 0, 2) \text{ m}$ .

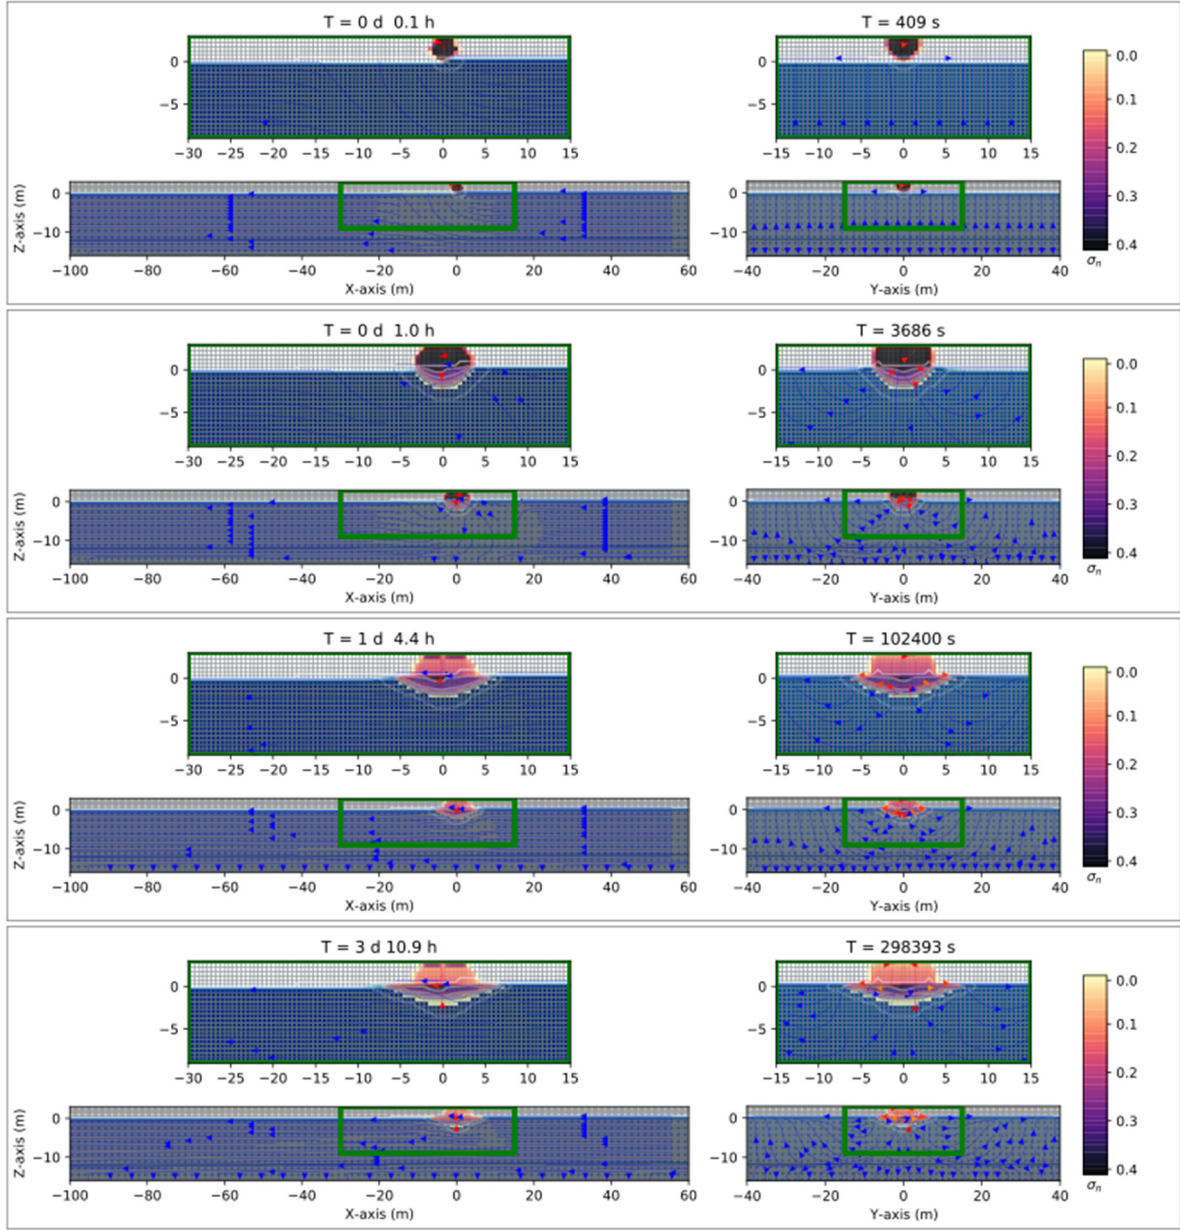

**Figure S11.** Three-dimensional numerical results on the saturation contours ( $\sigma_n = S_n \phi$ ) of a three-phase immiscible fluid flow (water + diesel oil + air) in a dry soil using a spatial grid resolution of  $0.50 \text{ m}$  and a grid dimension of  $160 \text{ m} \times 80 \text{ m} \times 19 \text{ m}$ , at different times. A hydraulic gradient of  $0.004$ . The spill is released from an oil pipeline at  $(x, y, z) = (0, 0, 2) \text{ m}$ .

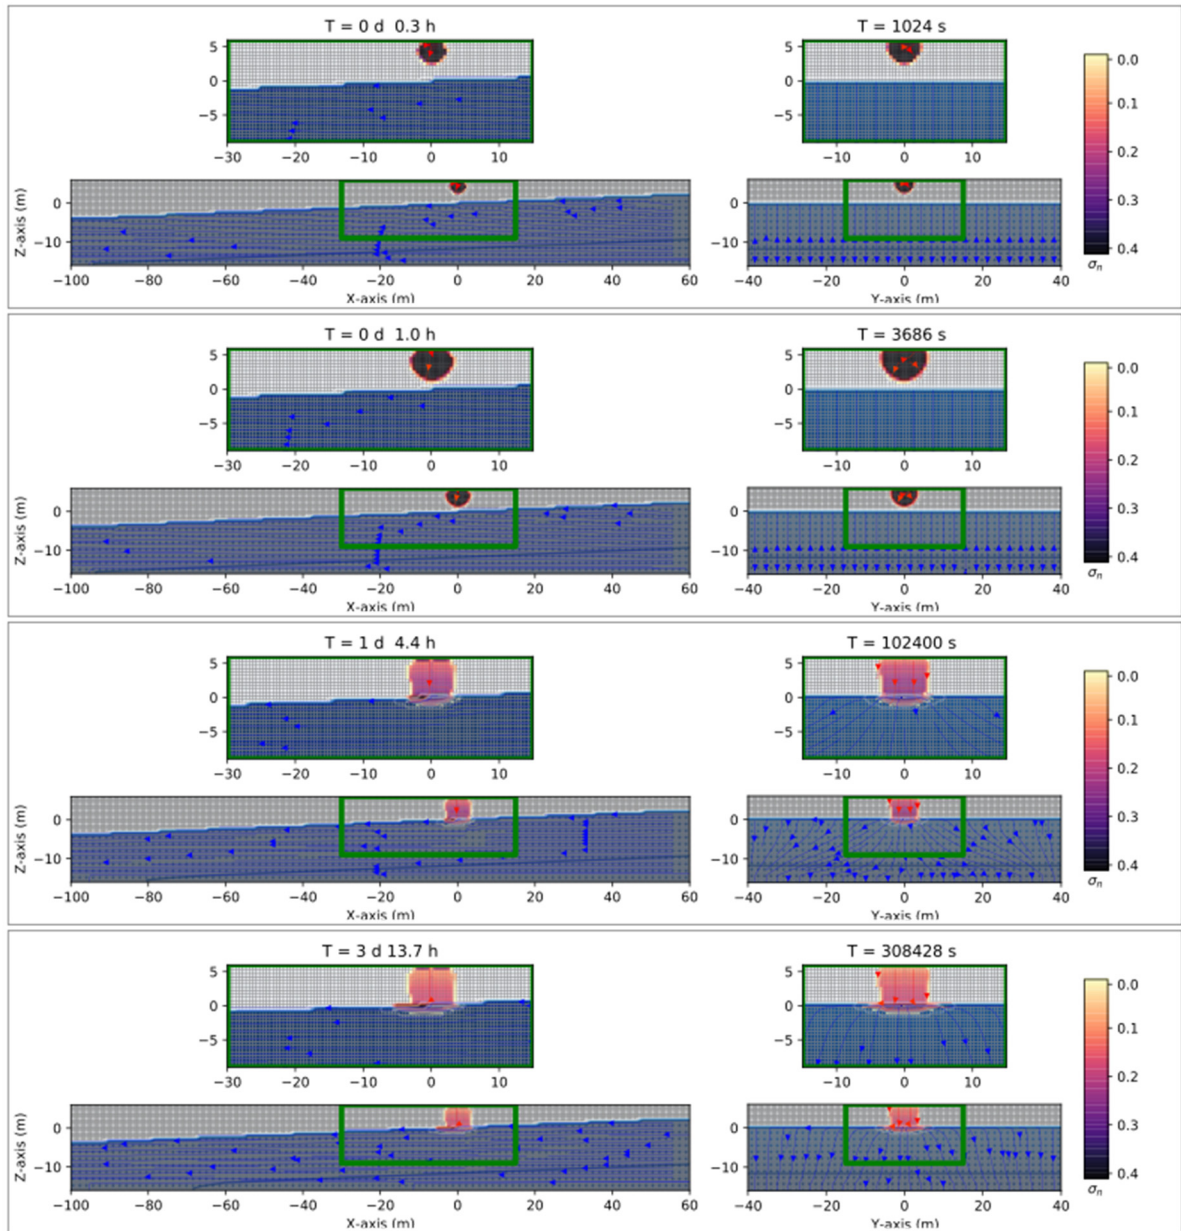

**Figure S12.** Three-dimensional numerical results on the saturation contours ( $\sigma_n = S_n \phi$ ) of a three-phase immiscible fluid flow (water + diesel oil + air) in a dry soil using a spatial grid resolution of  $0.50\text{ m}$  and a grid dimension of  $160\text{ m} \times 80\text{ m} \times 22\text{ m}$ , at different times. A hydraulic gradient of  $0.04$ . The spill is released from an oil pipeline at  $(x, y, z) = (0, 0, 5)\text{ m}$ .

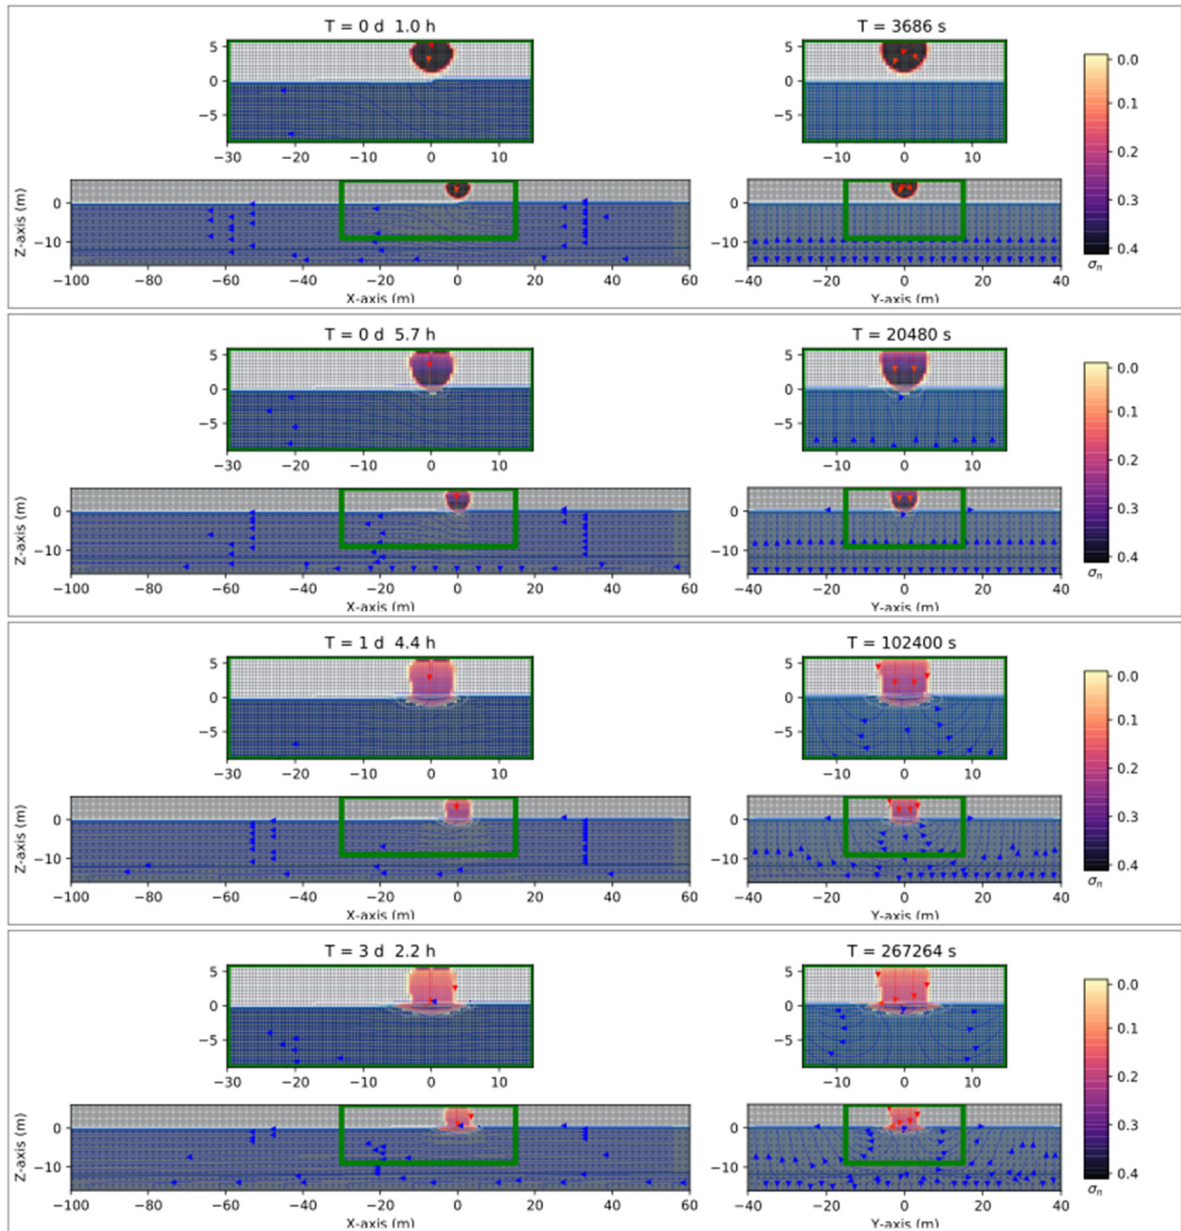

**Figure S13.** Three-dimensional numerical results on the saturation contours ( $\sigma_n = S_n \phi$ ) of a three-phase immiscible fluid flow (water + diesel oil + air) in a dry soil using a spatial grid resolution of  $0.50 \text{ m}$  and a grid dimension of  $160 \text{ m} \times 80 \text{ m} \times 22 \text{ m}$ , at different times. A hydraulic gradient of  $0.004$ . The spill is released from an oil pipeline at  $(x, y, z) = (0, 0, 5) \text{ m}$ .

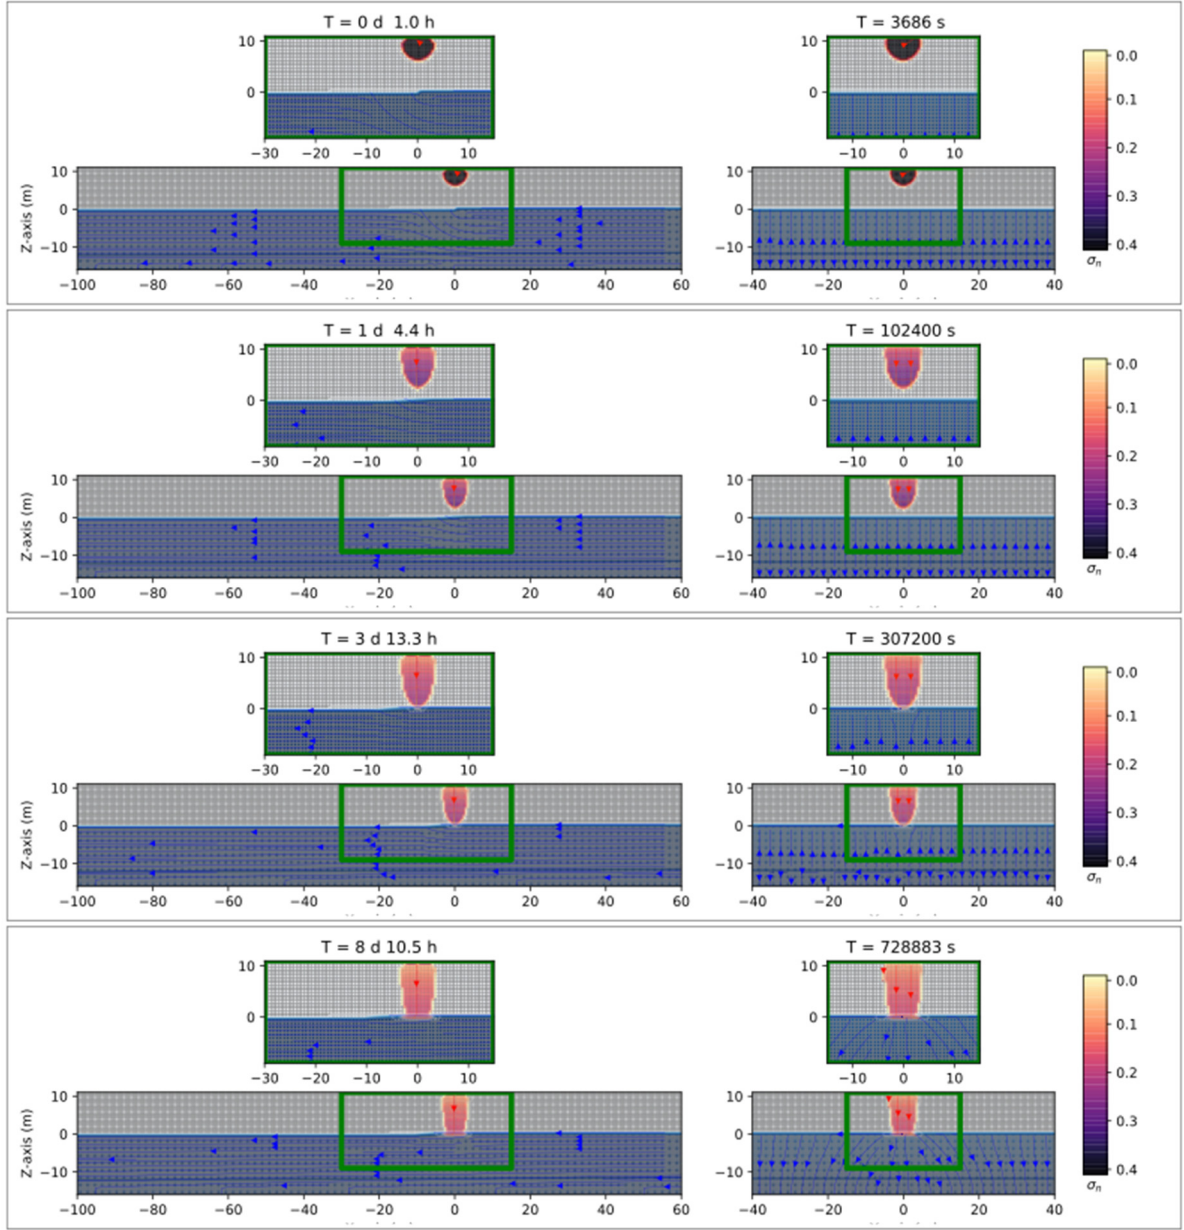

**Figure S14.** Three-dimensional numerical results on the saturation contours ( $\sigma_n = S_n\phi$ ) of a three-phase immiscible fluid flow (water + diesel oil + air) in a dry soil using a spatial grid resolution of  $0.50\text{ m}$  and a grid dimension of  $160\text{ m} \times 80\text{ m} \times 27\text{ m}$ , at different times. A hydraulic gradient of  $0.004$ . The spill is released from an oil pipeline at  $(x, y, z) = (0, 0, 10)\text{ m}$ .

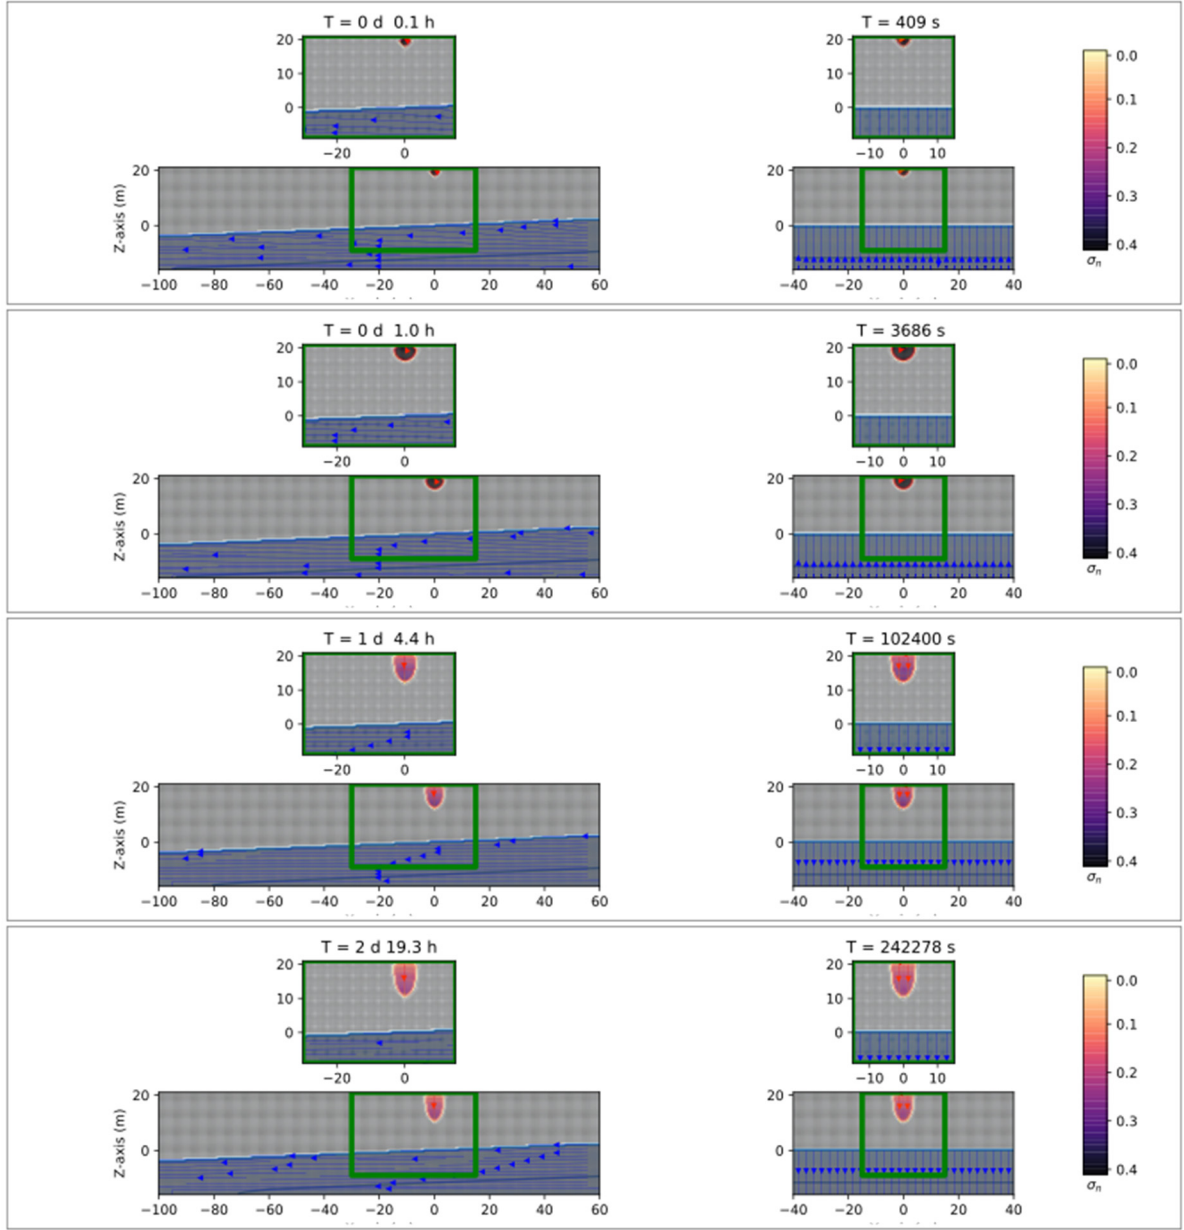

**Figure S15.** Three-dimensional numerical results on the saturation contours ( $\sigma_n = S_n \phi$ ) of a three-phase immiscible fluid flow (water + diesel oil + air) in a dry soil using a spatial grid resolution of  $0.50 \text{ m}$  and a grid dimension of  $160 \text{ m} \times 80 \text{ m} \times 37 \text{ m}$ , at different times. A hydraulic gradient of  $0.04$ . The spill is released from an oil pipeline at  $(x, y, z) = (0, 0, 20) \text{ m}$ .

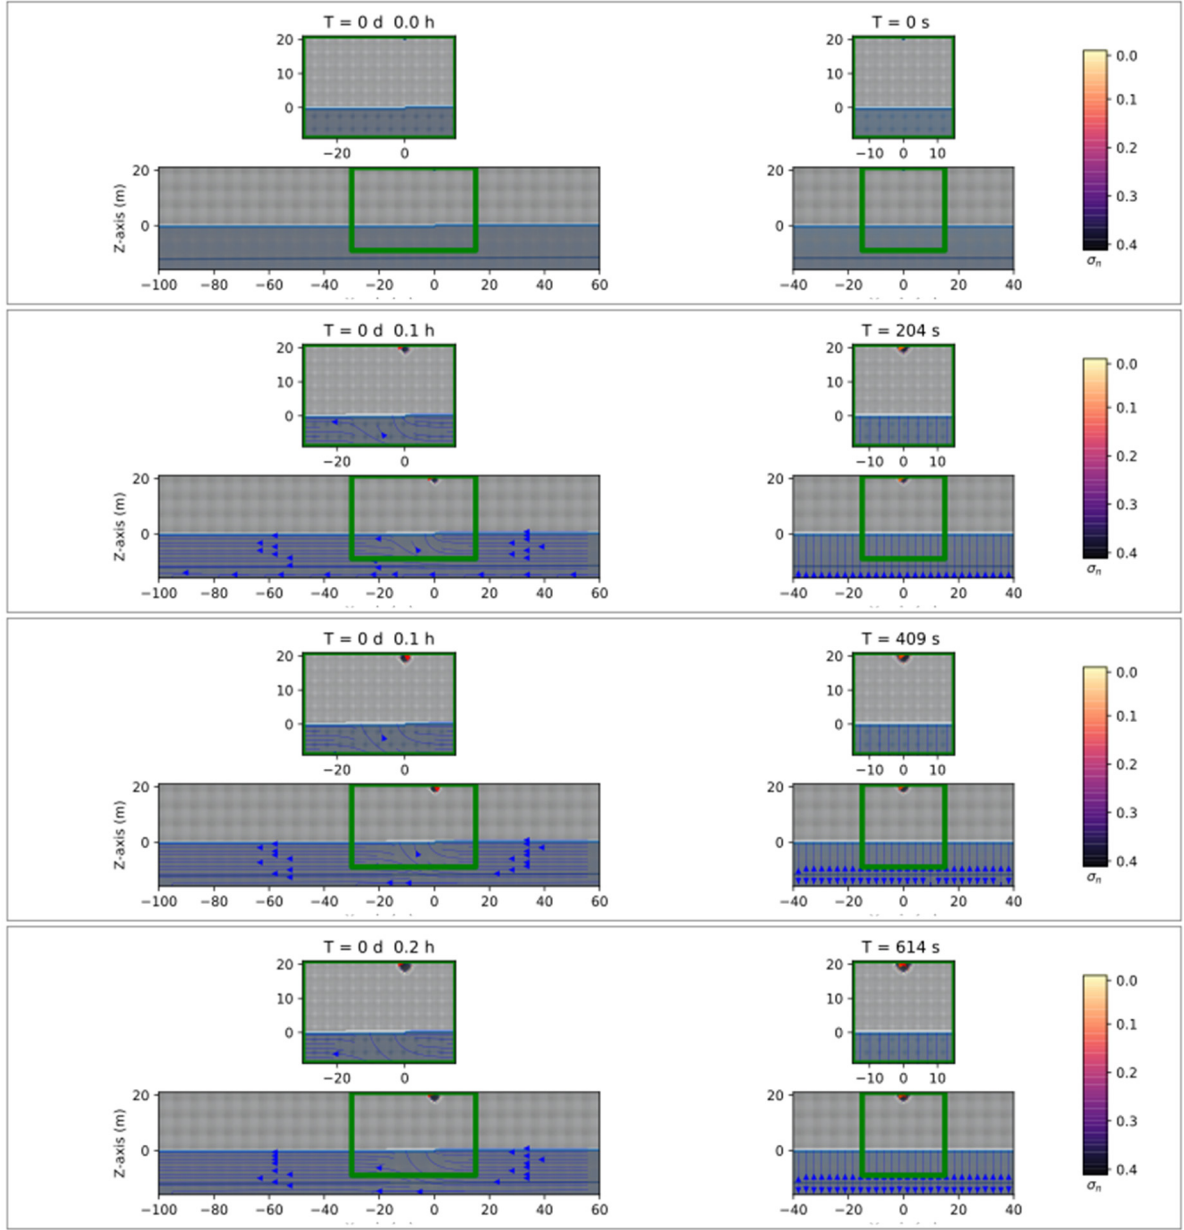

**Figure S16.** Three-dimensional numerical results on the saturation contours ( $\sigma_n = S_n \phi$ ) of a three-phase immiscible fluid flow (water + diesel oil + air) in a dry soil using a spatial grid resolution of  $0.50 \text{ m}$  and a grid dimension of  $160 \text{ m} \times 80 \text{ m} \times 37 \text{ m}$ , at different times. A hydraulic gradient of  $0.004$ . The spill is released from an oil pipeline at  $(x, y, z) = (0, 0, 20) \text{ m}$ .
